# Supplementary material
Source: MDPI journal article supplement (https://www.mdpi.com/2304-6740/10/12/253)
Supplement: s1 [file s1]

# Supplementary Materials:

## A One-Dimensional Cu(I) Coordination Polymer with Optical Sensing of Oxygen and Temperature

Wan-Tao Chen <sup>†</sup>, Chen-Hui Li <sup>†</sup>, Wan-Qing Zhou, Jing-Tao Huang, Jia-Wen Ye <sup>\*</sup> and Ling Chen <sup>\*</sup>

School of Biotechnology and Health Sciences, Wuyi University, Jiangmen, Guangdong 529000, China

<sup>\*</sup> Correspondence: wyuchemyjw@126.com (J.-W.Y.); wyuchemcling@126.com (L.C.).

<sup>†</sup> These authors contributed equally to this work.

**Figure S1.** The FTIR spectrum of **1**.

**Figure S2.** Comparison of coordination environments of **1·g** (blue) and **1** (green).

**Figure S3.** PXRD patterns of **1·g** and **1**.

**Figure S4.** Excitation-Emission map of **1**.

**Figure S5.** Emission spectra of **1·g** and **1**, excited by 365 nm.

**Figure S6.** The photographs of **1** (a) at 1 bar O<sub>2</sub>, (b) air and (c) vacuum, excited by 365 nm UV light.

**Figure S7.** The emission spectra of **1·g** in air and 1 atm O<sub>2</sub>.

**Figure S8.** Under the excitation of 365 nm, (a) the emission spectra of **1·g** in the temperature range from 80 to 300 K with an interval of 20 K, and (b) the integral intensities of **1·g** at different temperatures.

**Table S1.** Elemental analysis result of **1**.

**Table S2.** Crystallography data and structural refinements of **1·g** and **1**.

**Table S3.** Decay curves of **1** at 1 bar O<sub>2</sub>, air and vacuum, respectively, excited by 375-nm VPL and detected by 542 nm.

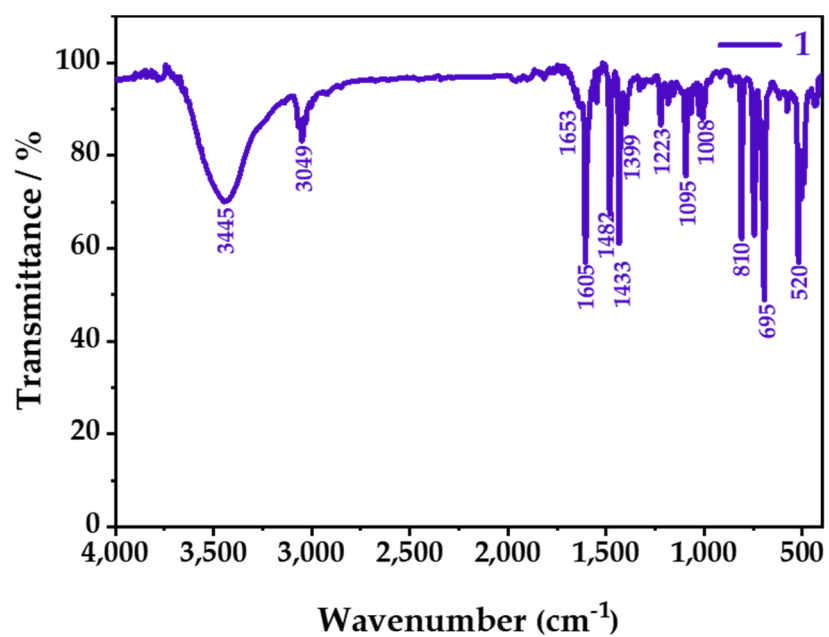

Figure S1. The FTIR spectrum of 1.

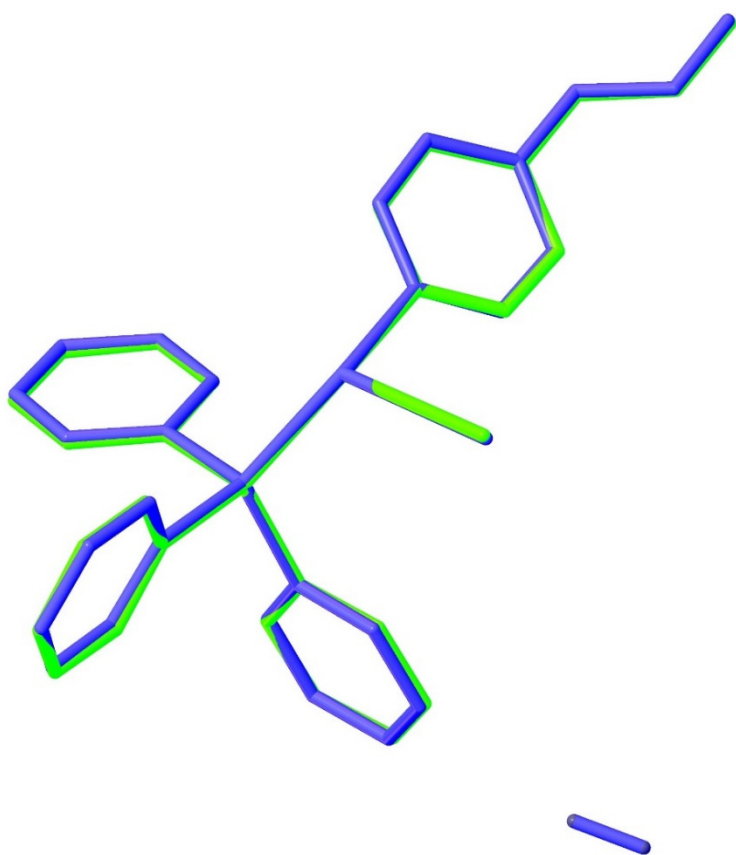

Figure S2. Comparison of coordination environments of 1·g (blue) and 1 (green).

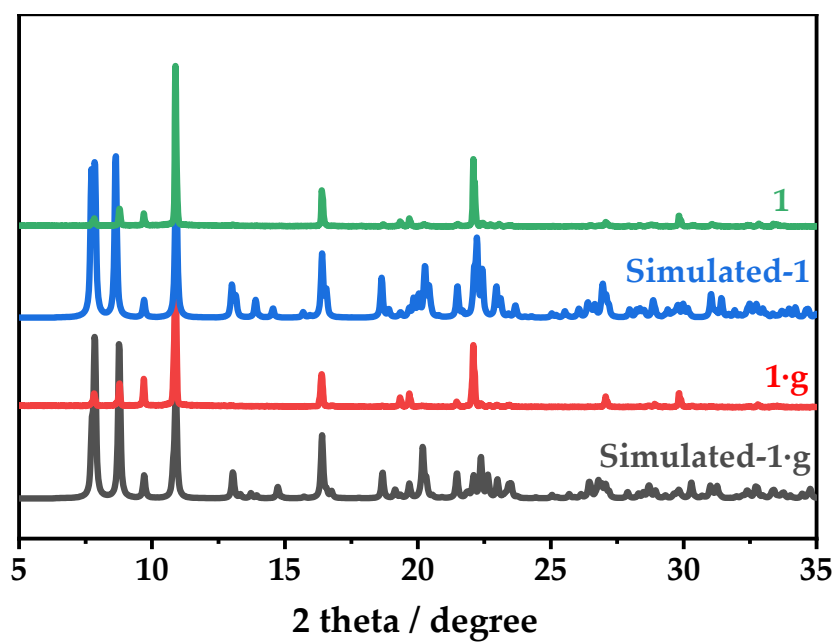

Figure S3. PXRD patterns of 1·g and 1.

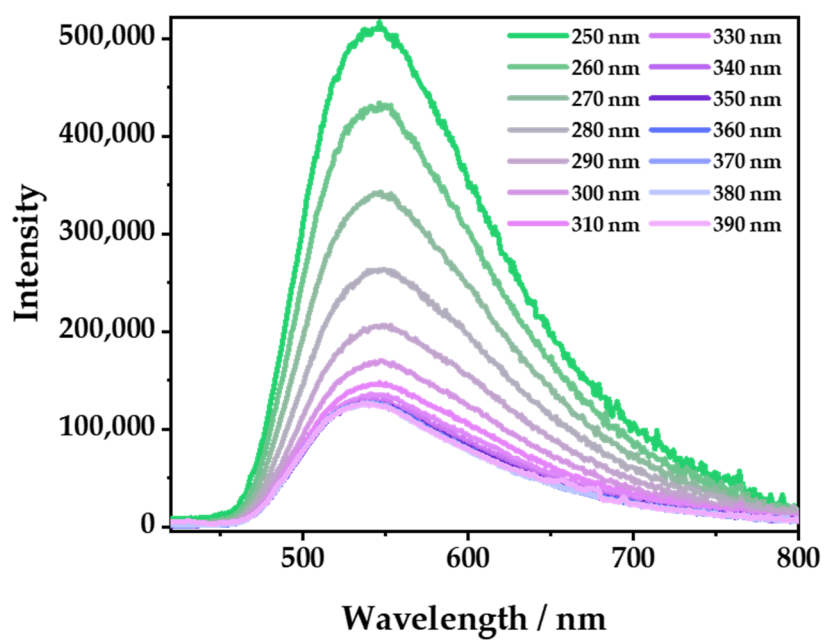

Figure S4. Excitation-Emission map of 1.

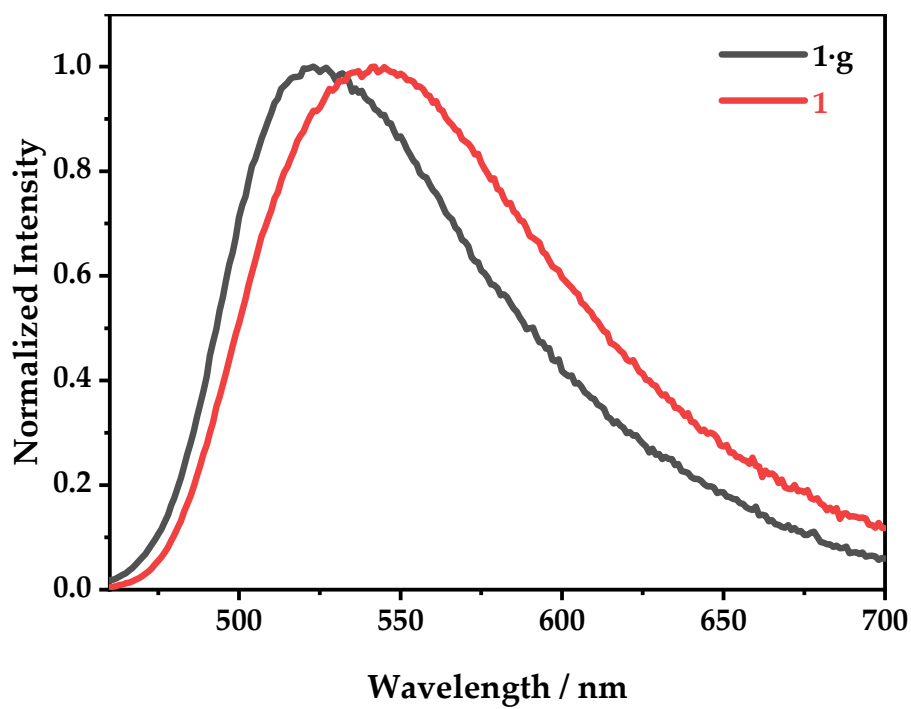

Figure S5. Emission spectra of 1·g and 1, excited by 365 nm.

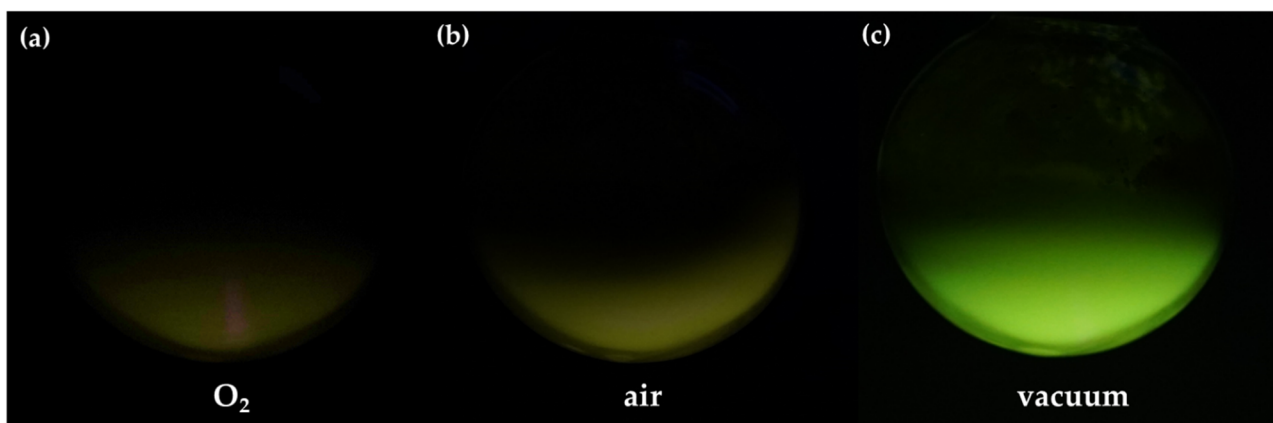

Figure S6. The photographs of 1 (a) at 1 bar O<sub>2</sub>, (b) air and (c) vacuum, excited by 365 nm UV light.

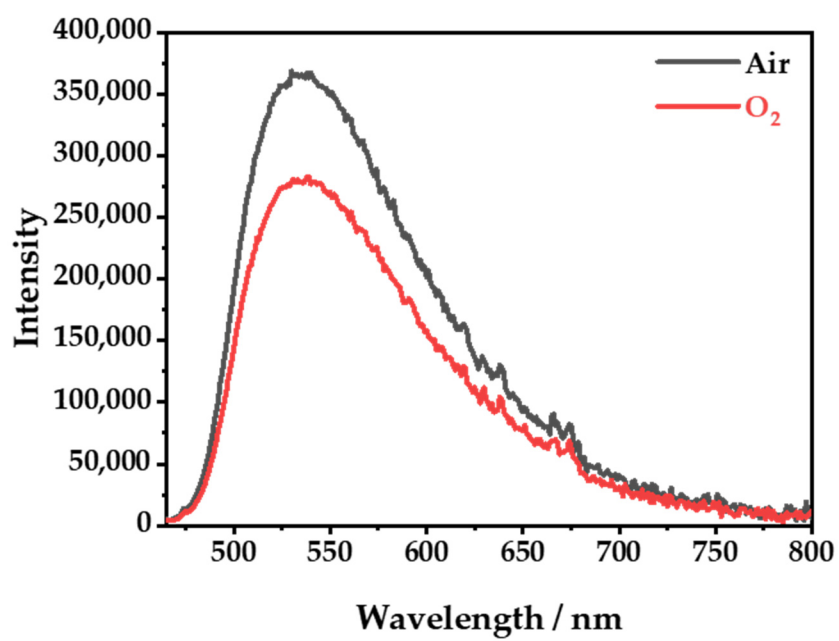

**Figure S7.** The emission spectra of 1·g in air and 1 atm O<sub>2</sub>.

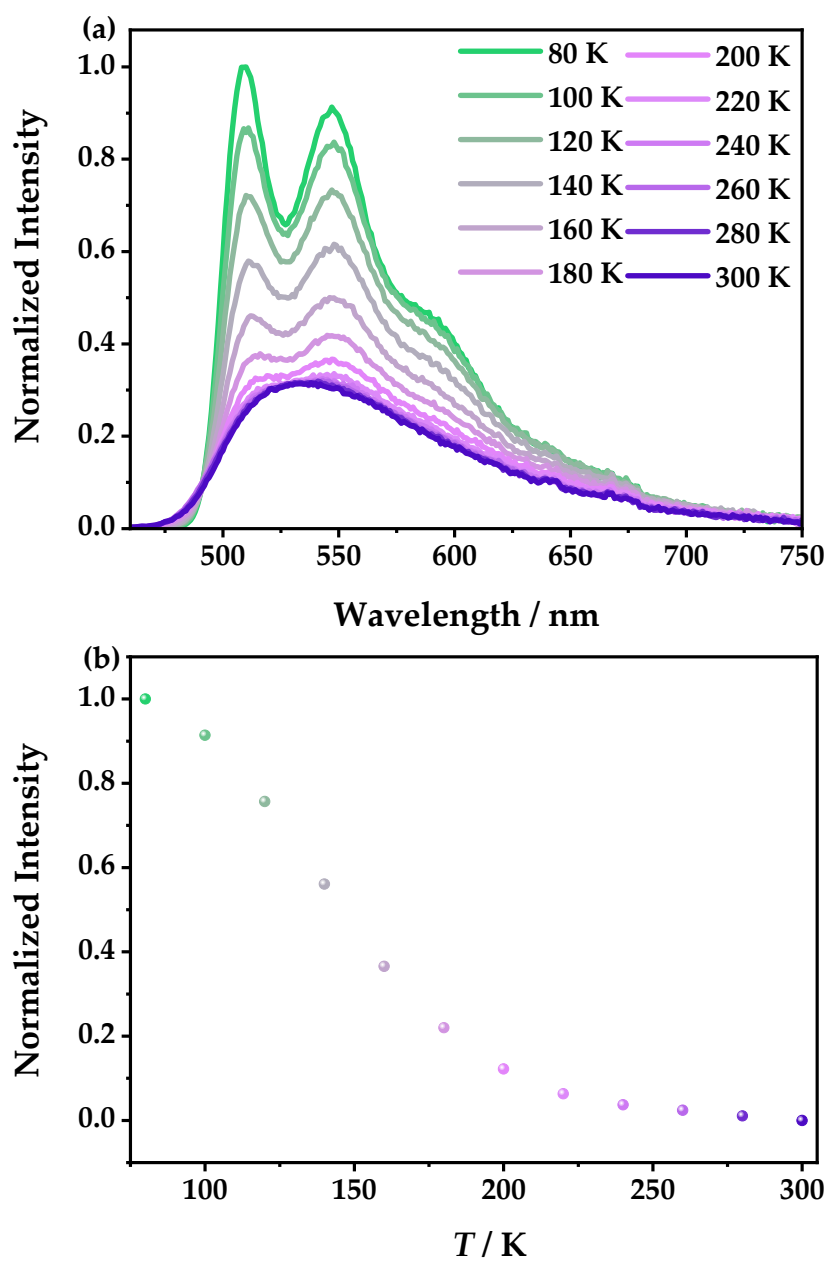

**Figure S8.** Under the excitation of 365 nm, (a) the emission spectra of **1·g** in the temperature range from 80 to 300 K with an interval of 20 K, and (b) the integral intensities of **1·g** at different temperatures.

**Table S1.** Elemental analysis result of **1**.

| Calculated Results |       |       | Experimental Results |       |       |
|--------------------|-------|-------|----------------------|-------|-------|
| C / %              | N / % | H / % | C / %                | N / % | H / % |
| 53.52              | 2.31  | 3.66  | 53.07                | 2.29  | 3.76  |

**Table S2.** Crystallography data and structural refinements of **1·g** and **1**.

| Complex                                                          | <b>1·g</b>                                                                                                  | <b>1</b>                                                                                     |
|------------------------------------------------------------------|-------------------------------------------------------------------------------------------------------------|----------------------------------------------------------------------------------------------|
| Formula                                                          | C <sub>53</sub> H <sub>43</sub> Cu <sub>2</sub> I <sub>2</sub> N <sub>2</sub> O <sub>2</sub> P <sub>2</sub> | C <sub>52</sub> H <sub>42</sub> Cu <sub>2</sub> I <sub>2</sub> N <sub>2</sub> P <sub>2</sub> |
| Formula weight                                                   | 1166.71                                                                                                     | 1137.69                                                                                      |
| Temperature / K                                                  | 296.09(10)                                                                                                  | 297.26(10)                                                                                   |
| Crystal system                                                   | Triclinic                                                                                                   | Triclinic                                                                                    |
| Space group                                                      | <i>P</i> $\bar{1}$                                                                                          | <i>P</i> $\bar{1}$                                                                           |
| <i>a</i> / Å                                                     | 9.3463(5)                                                                                                   | 9.3735(2)                                                                                    |
| <i>b</i> / Å                                                     | 12.0932(6)                                                                                                  | 12.0348(2)                                                                                   |
| <i>c</i> / Å                                                     | 12.1787(7)                                                                                                  | 12.1231(3)                                                                                   |
| $\alpha$ / °                                                     | 109.733(5)                                                                                                  | 109.047(2)                                                                                   |
| $\beta$ / °                                                      | 99.360(5)                                                                                                   | 99.339(2)                                                                                    |
| $\gamma$ / °                                                     | 100.949(4)                                                                                                  | 101.151(2)                                                                                   |
| Volume/Å <sup>3</sup>                                            | 1233.21(12)                                                                                                 | 1230.28(5)                                                                                   |
| <i>Z</i>                                                         | 1                                                                                                           | 1                                                                                            |
| <i>R</i> <sub>int</sub>                                          | 0.0443                                                                                                      | 0.0431                                                                                       |
| <i>R</i> <sub>1</sub> [ <i>I</i> > 2σ( <i>I</i> )] <sup>a</sup>  | 0.0272                                                                                                      | 0.0268                                                                                       |
| <i>wR</i> <sub>2</sub> [ <i>I</i> > 2σ( <i>I</i> )] <sup>b</sup> | 0.0685                                                                                                      | 0.0694                                                                                       |
| <i>R</i> <sub>1</sub> (all data)                                 | 0.0287                                                                                                      | 0.0284                                                                                       |
| <i>wR</i> <sub>2</sub> (all data)                                | 0.0696                                                                                                      | 0.0704                                                                                       |
| GOF                                                              | 1.070                                                                                                       | 1.057                                                                                        |

<sup>a</sup> $R_1 = \sum ||F_o| - |F_c|| / \sum |F_o|$

<sup>b</sup> $wR_2 = [w(F_o^2 - F_c^2)^2 / \sum w(F_o^2)^2]^{1/2}$

**Table S3.** Lifetime fitting results of **1** at 1 bar O<sub>2</sub>, air and vacuum, respectively, excited by 375-nm VPL and detected by 542 nm.

|                      | Fitted values |               |               |                          | $\chi^2$ |
|----------------------|---------------|---------------|---------------|--------------------------|----------|
|                      | $\tau_1$ (μs) | $\tau_2$ (μs) | $\tau_3$ (μs) | $\tau_{\text{int}}$ (μs) |          |
| 1 bar O <sub>2</sub> | 0.097         | 0.241         | 0.860         | 0.318                    | 1.086    |
| air                  | 0.366         | 1.331         | 2.715         | 1.520                    | 1.271    |
| vacuum               | 2.436         | 11.503        | 27.241        | 22.007                   | 1.240    |
